# Supplementary material for: Transcriptional Profile of Soybean Seeds with Contrasting Seed Coat Color
Source: MDPI journal article supplement (doi:10.3390/plants12071555), 2023-04-04
Supplement: s1 [file s1]

**Supplementary Table 1**- List of primers used to quantify the relative expression of target genes via RT-qPCR.

| Gene ID         | Annotation     | Primer 5' - 3'                 | Tm (°C) |
|-----------------|----------------|--------------------------------|---------|
| Glyma.11G228900 | <i>CYP90A1</i> | Primer F: CCTGCTCGGAAAACACTCTC | 60.0    |
|                 |                | Primer R: GAGTTGGCGAAGCTCATTGT | 60.4    |
| Glyma.13G217400 | <i>CYP710A</i> | Primer F: ATGGCTCAATCAGTCCCAAG | 60.1    |
|                 |                | Primer R: TCTGGGATGTCTGGAGGTTC | 60.0    |
| Glyma.08G204300 | <i>ACSF3</i>   | Primer F: ATCTCGGTGGAGCTCGAGTA | 60.0    |
|                 |                | Primer R: CCACTAAGCCAAATCCCAAG | 59.6    |
| Glyma.03G129700 | <i>CBL</i>     | Primer F: AGTTGTGTGCTGAGGGGTTC | 60.2    |
|                 |                | Primer R: GGAAGCATCATCCACCAAAG | 60.5    |
| Glyma.02G254600 | <i>HCT</i>     | Primer F: TTCCCAGACCAAAAGTCCAC | 59.9    |
|                 |                | Primer R: AAGAGGCATCCCTTTTGGAT | 59.9    |
| Glyma.16G032200 | <i>ACSI</i>    | Primer F: ATGAGTGGAGGGGCAACA   | 60.0    |
|                 |                | Primer R: GGGTGGGAATCATAAAAGCA | 60.6    |
| Glyma.08G108800 | <i>SAHH</i>    | Primer F: CTATGAGAAGACCGGCGAAC | 59.8    |
|                 |                | Primer R: GAGACGCTCCTTCATCTTGC | 60.1    |

**Legend:** **CYP90A1:** cytochrome P450, family 90, subfamily A, polypeptide 1; **CYP710A:** K09832 - cytochrome P450, family 710, subfamily A; **ACSF3:** malonyl-CoA/methylmalonyl-CoA synthetase, EC.6.2.1.3; **CBL:** cystathionine beta-lyase, (EC.4.4.1.8) -; **HCT:** Shikimate O-hydroxycinnamoyltransferase (EC.2.3.1.133); **ACSI:** 1-aminocyclopropane-1-carboxylate synthase (EC.4.4.1.14); **SAHH:** S-adenosylhomocysteinase hydrolase (EC.3.3.1.1).
